# Supplementary material
Source: publisher site journal article supplement (https://www.dovepress.com/article/390272)
Supplement: Supplementary file 1 [file get_supplementary_file.php]

Supplementary Table1 Subgroup analyses of incidence of laryngopharyngeal reflux in OSAHS patients

| Subgroup analysis(n) | ES (95% CI)     | P-value | I <sup>2</sup> (%) | Ph     |
|----------------------|-----------------|---------|--------------------|--------|
| Overall (26)         | 0.48(0.40-0.56) | <0.001  | 96.7               | <0.001 |
| Ethnicity            |                 |         |                    |        |
| Caucasian (6)        | 0.59(0.42-0.77) | <0.001  | 94.2               | <0.001 |
| Asian (15)           | 0.43(0.33-0.53) | <0.001  | 93.0               | <0.001 |
| Latino (5)           | 0.56(0.31-0.82) | <0.001  | 98.7               | <0.001 |
| BMI                  |                 |         |                    |        |
| BMI < 30(14)         | 0.41(0.32-0.51) | <0.001  | 93.4               | <0.001 |
| BMI ≥ 30(12)         | 0.59(0.43-0.75) | <0.001  | 97.4               | <0.001 |
| AHI                  |                 |         |                    |        |
| AHI < 30(14)         | 0.44(0.40-0.58) | <0.001  | 96.5               | <0.001 |
| AHI ≥ 30(12)         | 0.55(0.41-0.70) | <0.001  | 96.7               | <0.001 |

Ph: P<sub>heterogeneity</sub>

Supplementary Table 2 Meta-analysis: differences regarding AHI, BMI, age and LSO<sub>2</sub> between patients with and without laryngopharyngeal reflux disease

| Study (LRP- versus. LRP+) | WMD (95% CI)        | P-value | I <sup>2</sup> (%) | P <sub>h</sub> |
|---------------------------|---------------------|---------|--------------------|----------------|
| Age(n=8)                  | -0.80(-2.77-1.17)   | 0.425   | 0                  | 0.678          |
| BMI(n=8)                  | -1.61(-3.10- -0.12) | 0.034   | 81.5               | <0.001         |
| AHI(n=10)                 | -5.61(-9.51- -1.70) | 0.005   | 65.1               | 0.002          |
| LSO <sub>2</sub> (n=5)    | 3.82(2.81-4.83)     | 0.007   | 0                  | 0.822          |

P<sub>h</sub>: P heterogeneity; LSO<sub>2</sub>: Lowest oxygen saturation

Supplementary figure 1

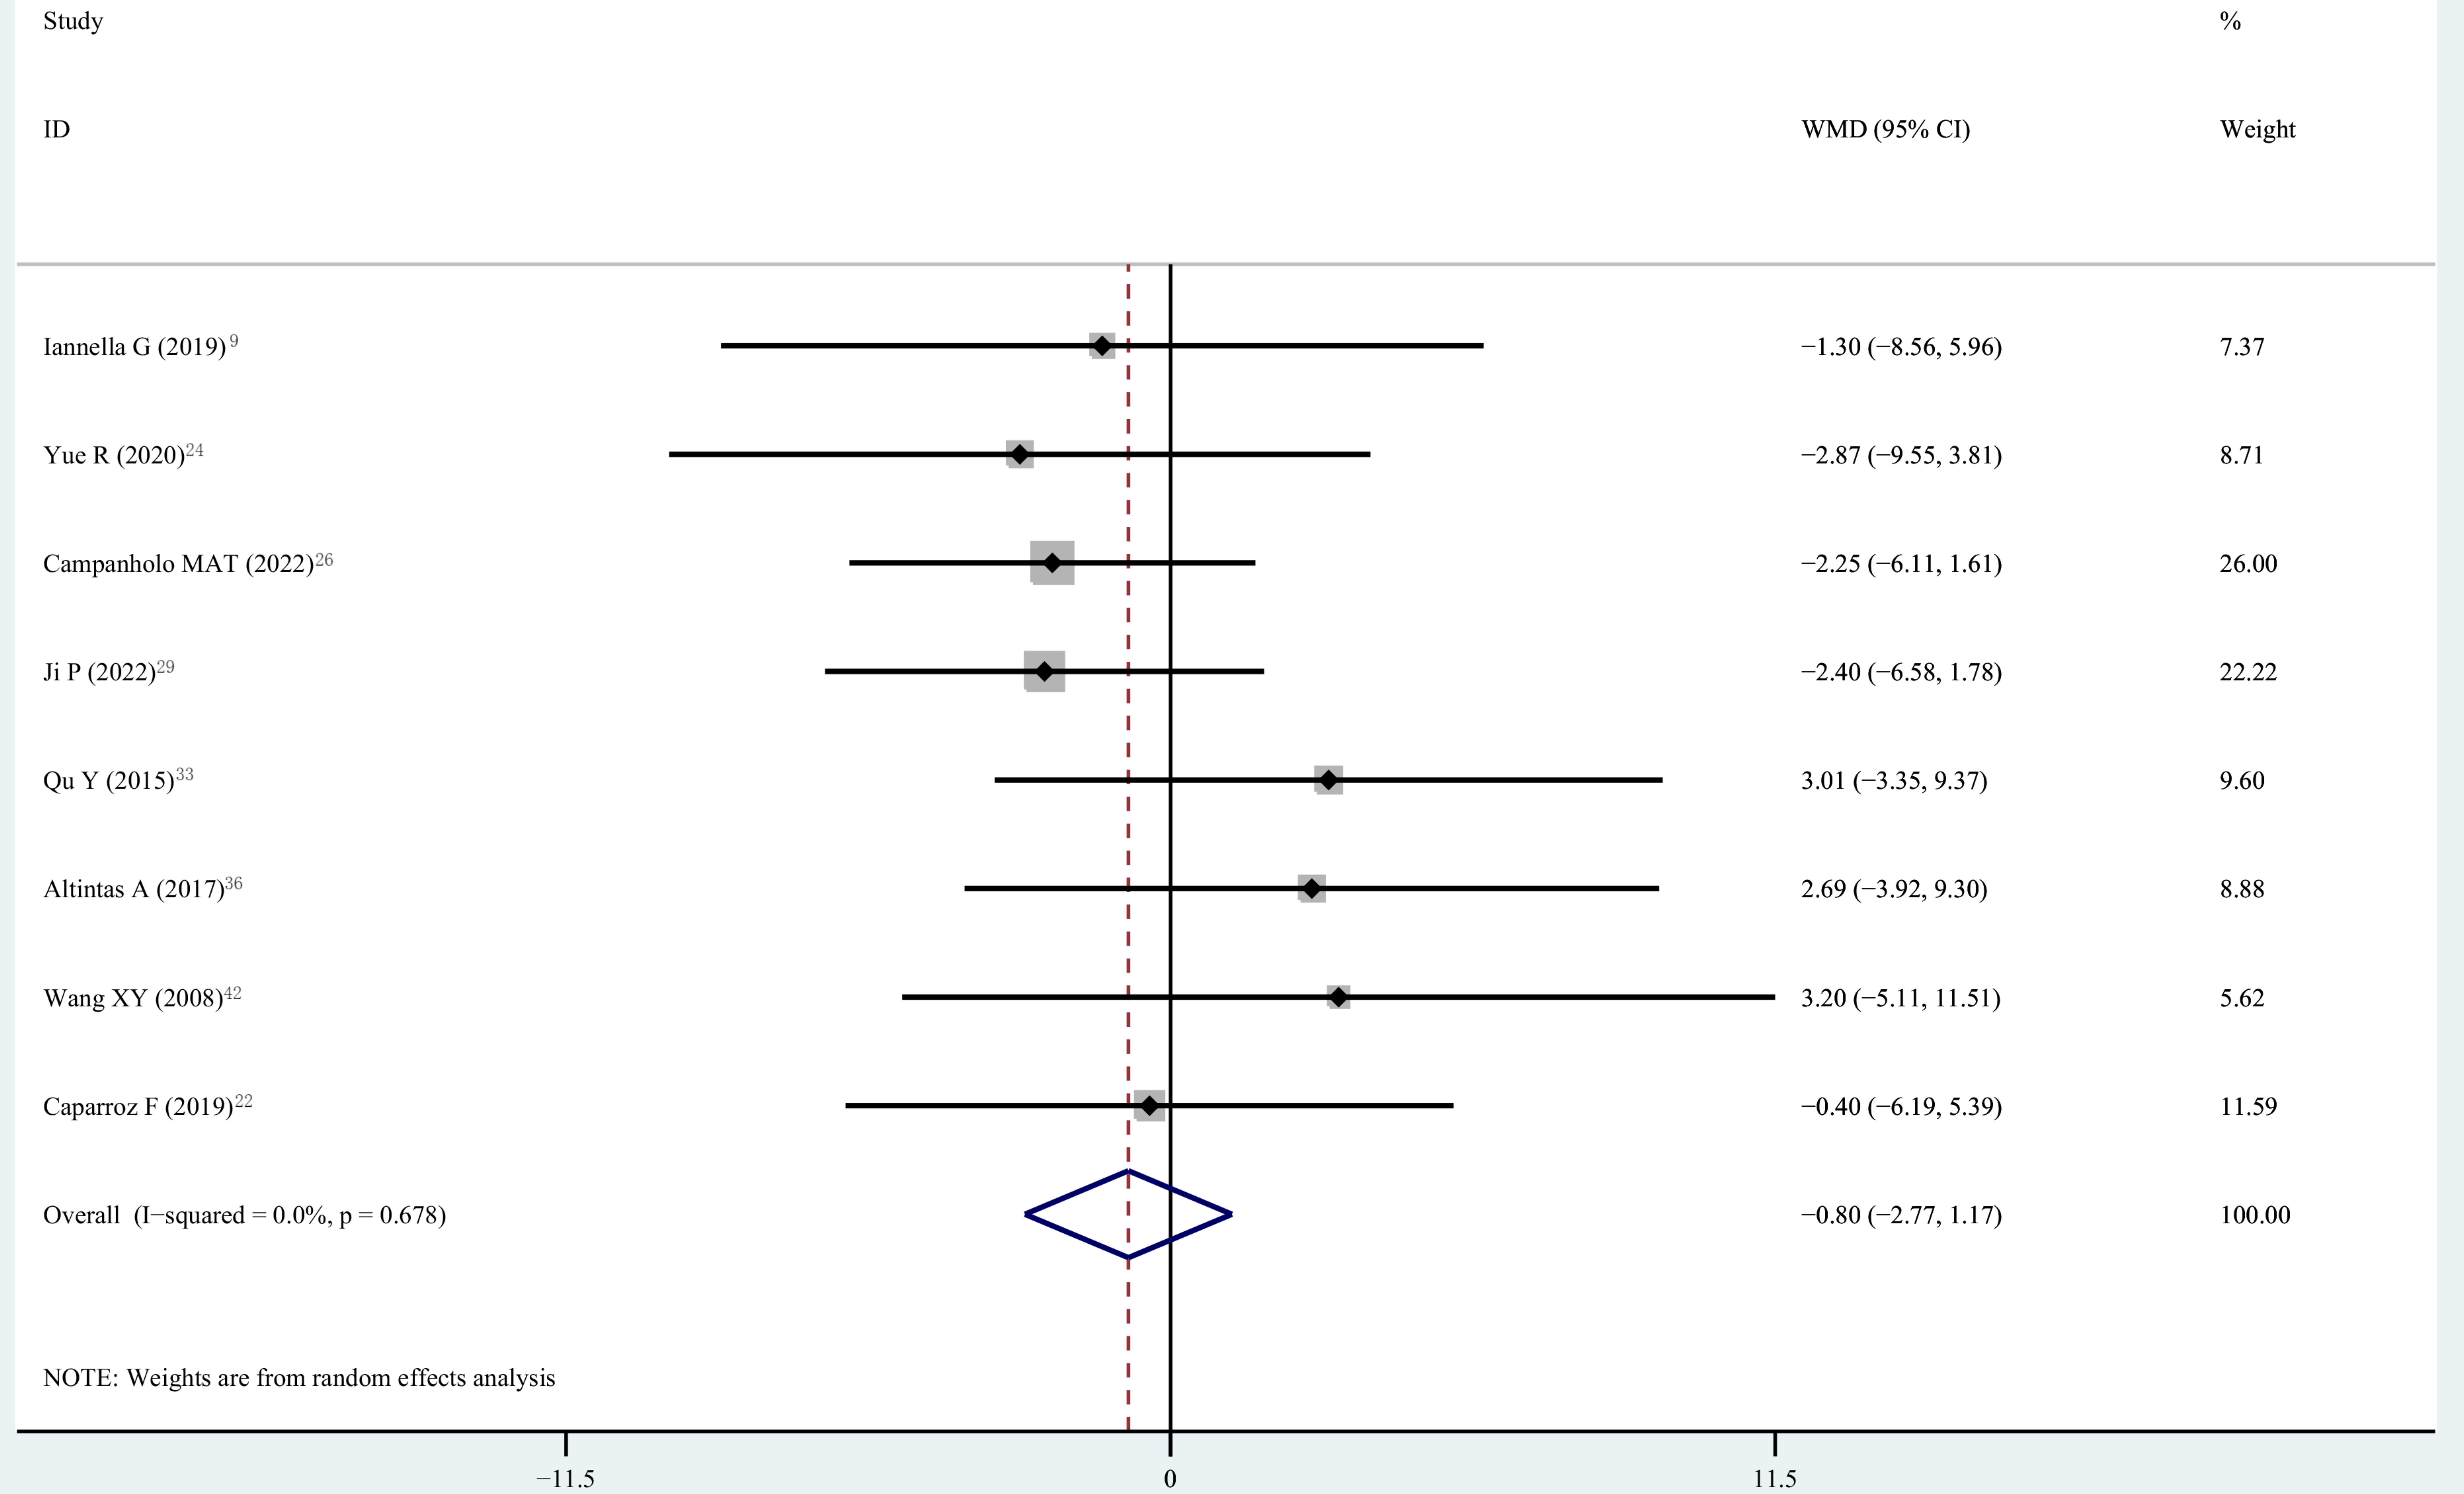

Supplementary figure 2

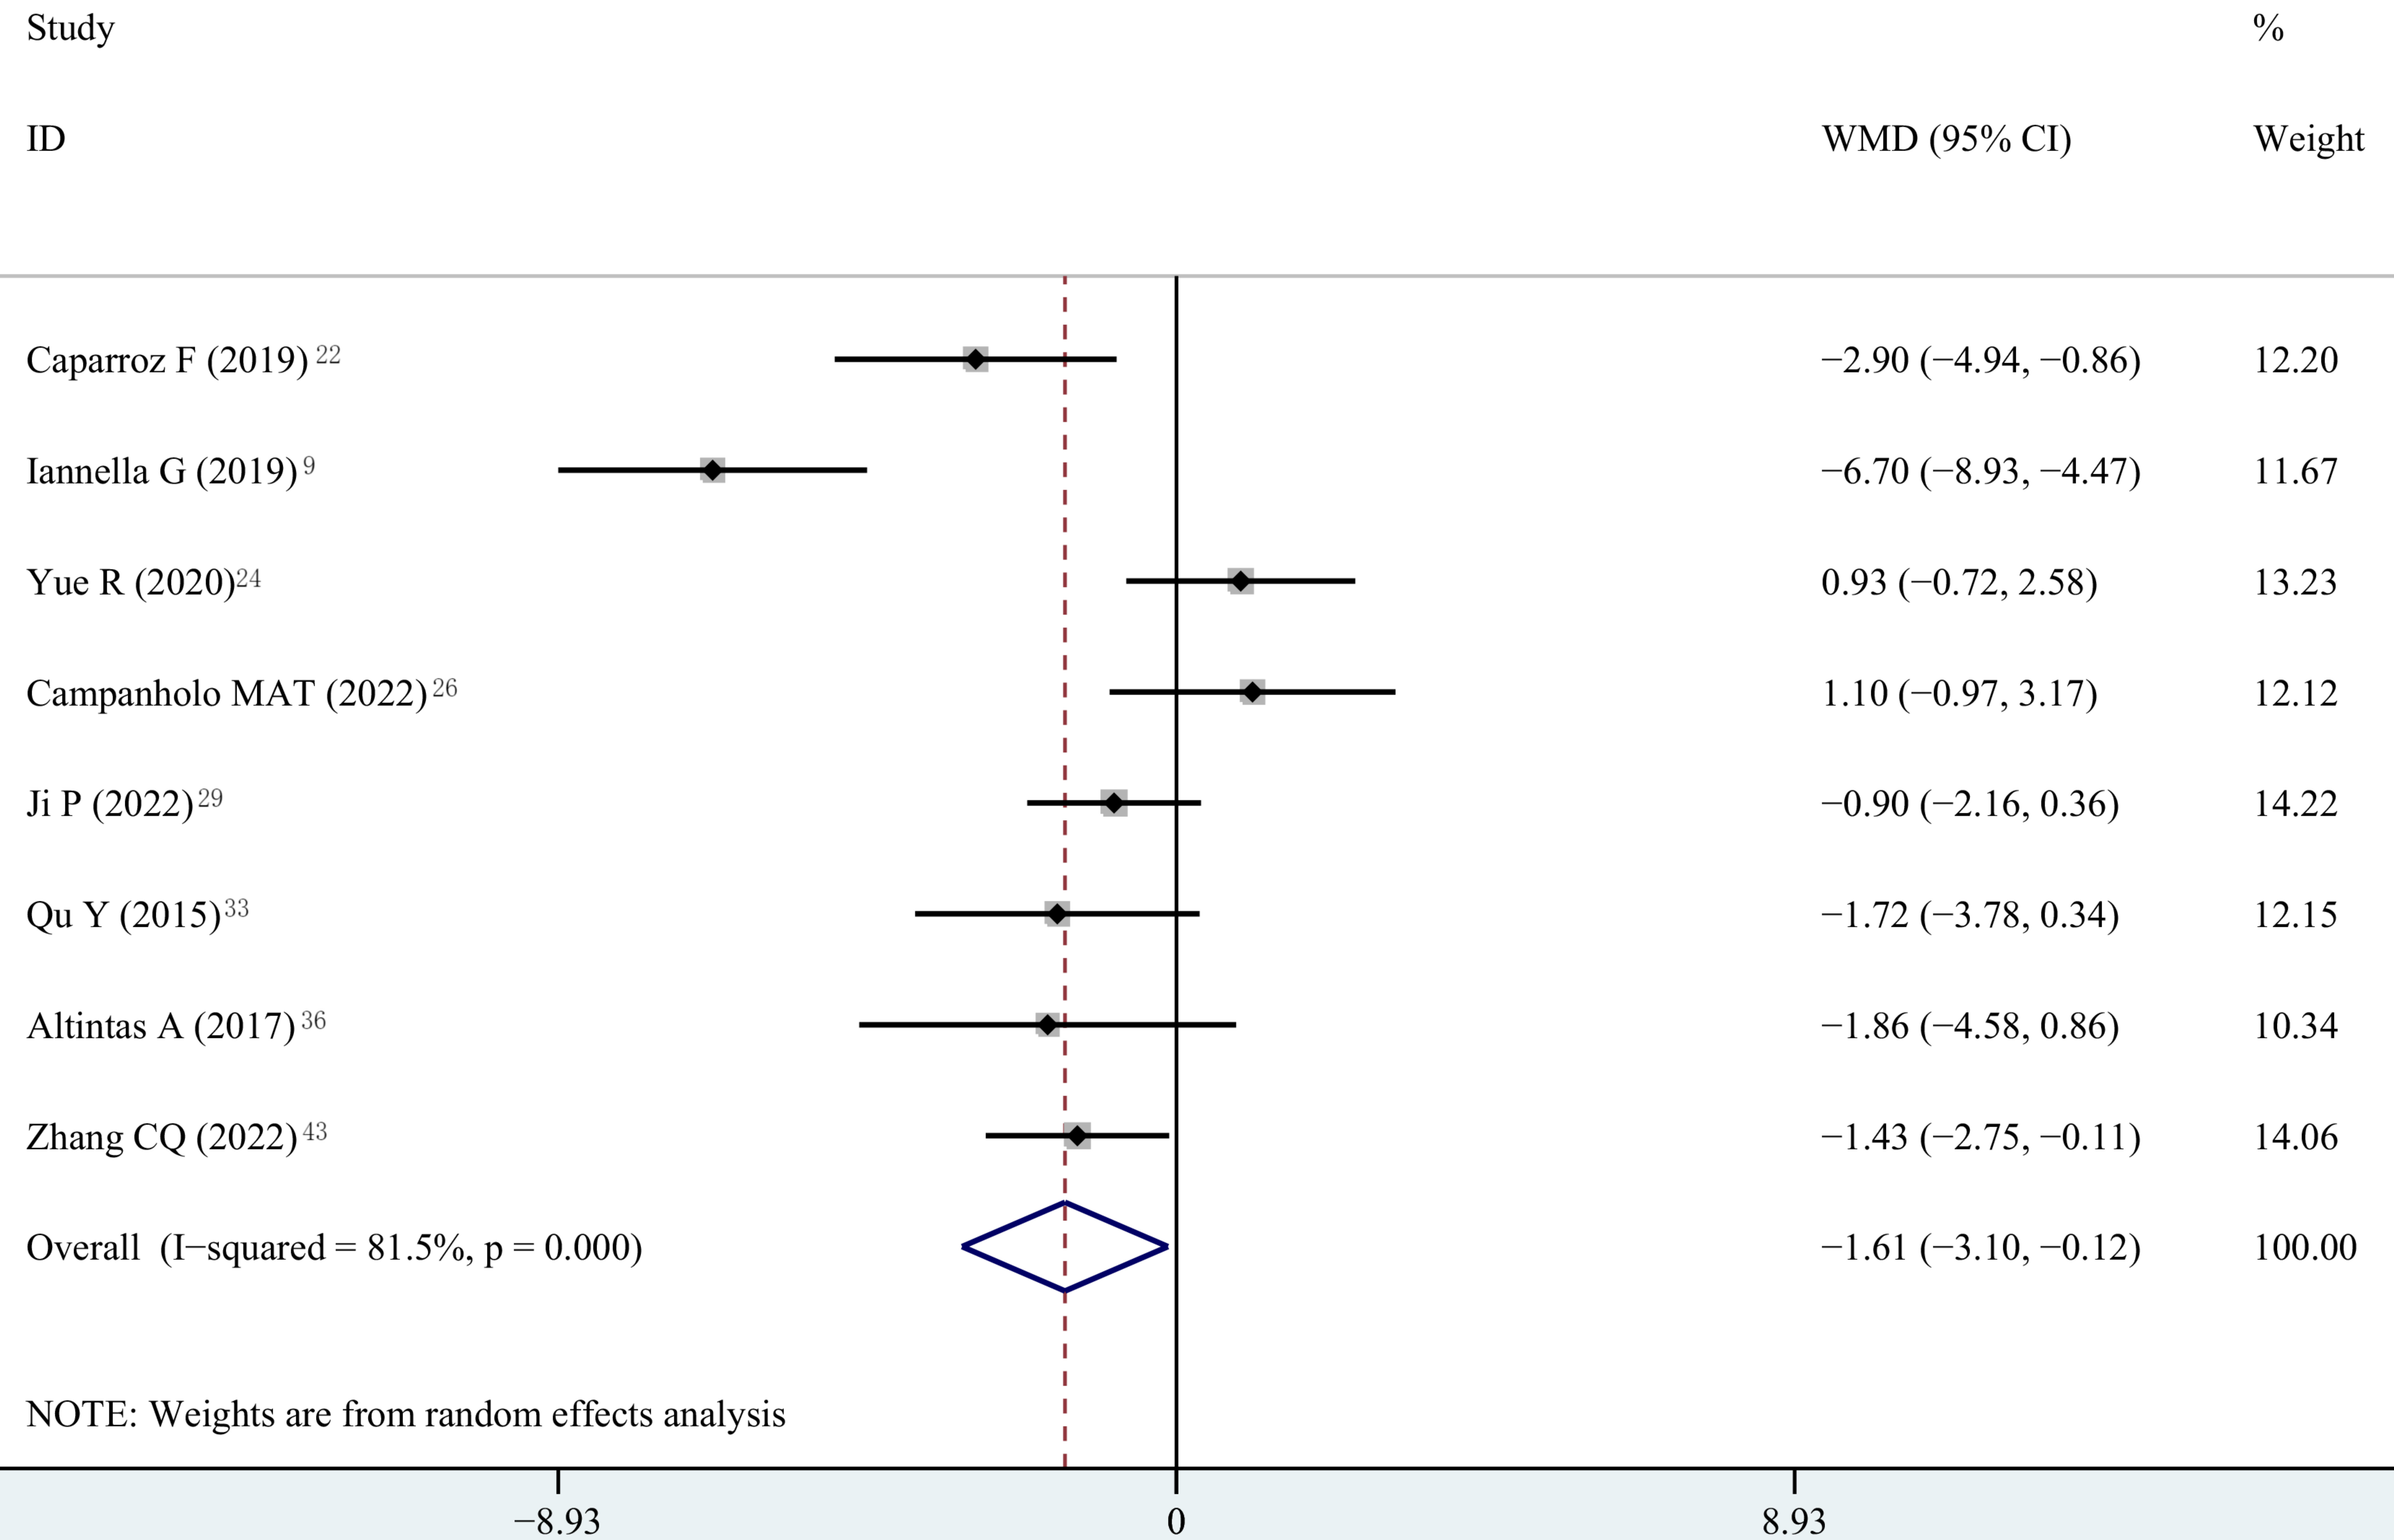

Supplementary figure 3

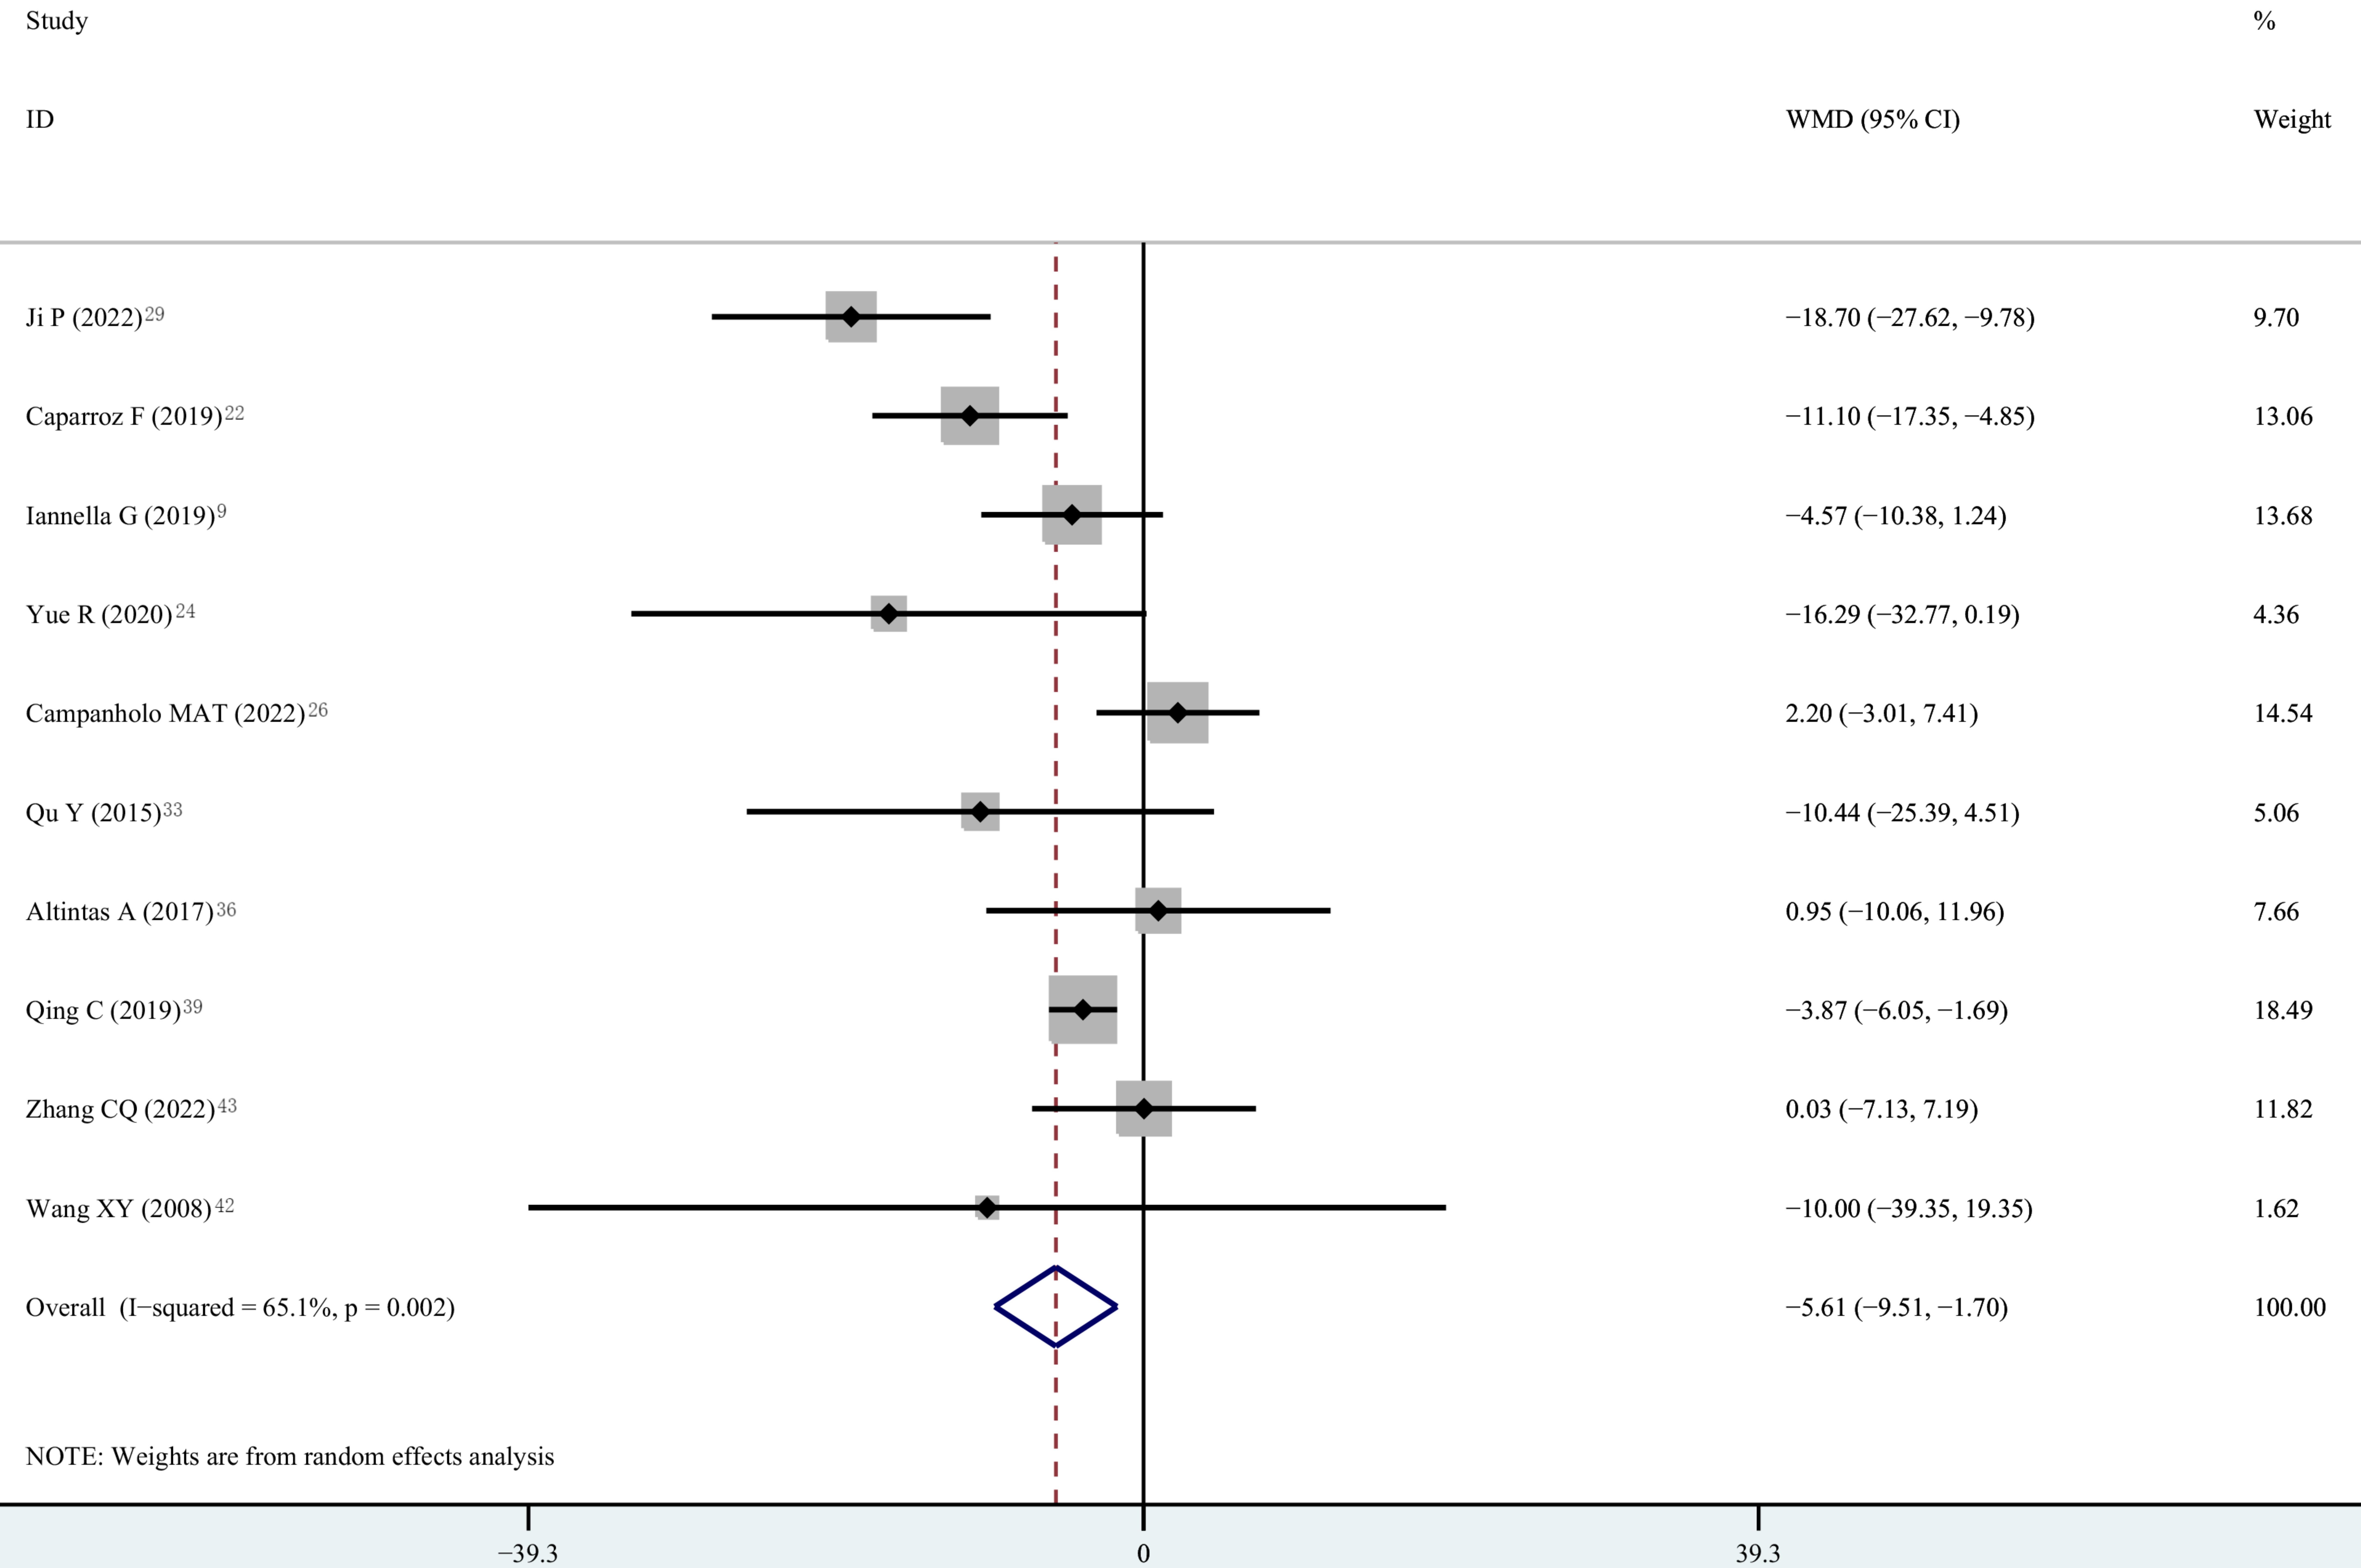

Supplementary figure 4

Study

%

ID

WMD (95% CI)

Weight

Caparroz F (2018)<sup>22</sup>

3.10 (-1.64, 7.84)

4.57

Ji P (2022)<sup>29</sup>

4.60 (-1.12, 10.32)

3.15

Qu Y (2015)<sup>33</sup>

3.41 (2.14, 4.68)

63.60

Qing C (2019)<sup>39</sup>

4.78 (2.87, 6.69)

28.10

Wang XY (2008)<sup>42</sup>

3.70 (-9.50, 16.90)

0.59

Overall (I-squared = 0.0%, p = 0.822)

3.82 (2.81, 4.83)

100.00

NOTE: Weights are from random effects analysis

-16.9

0

16.9

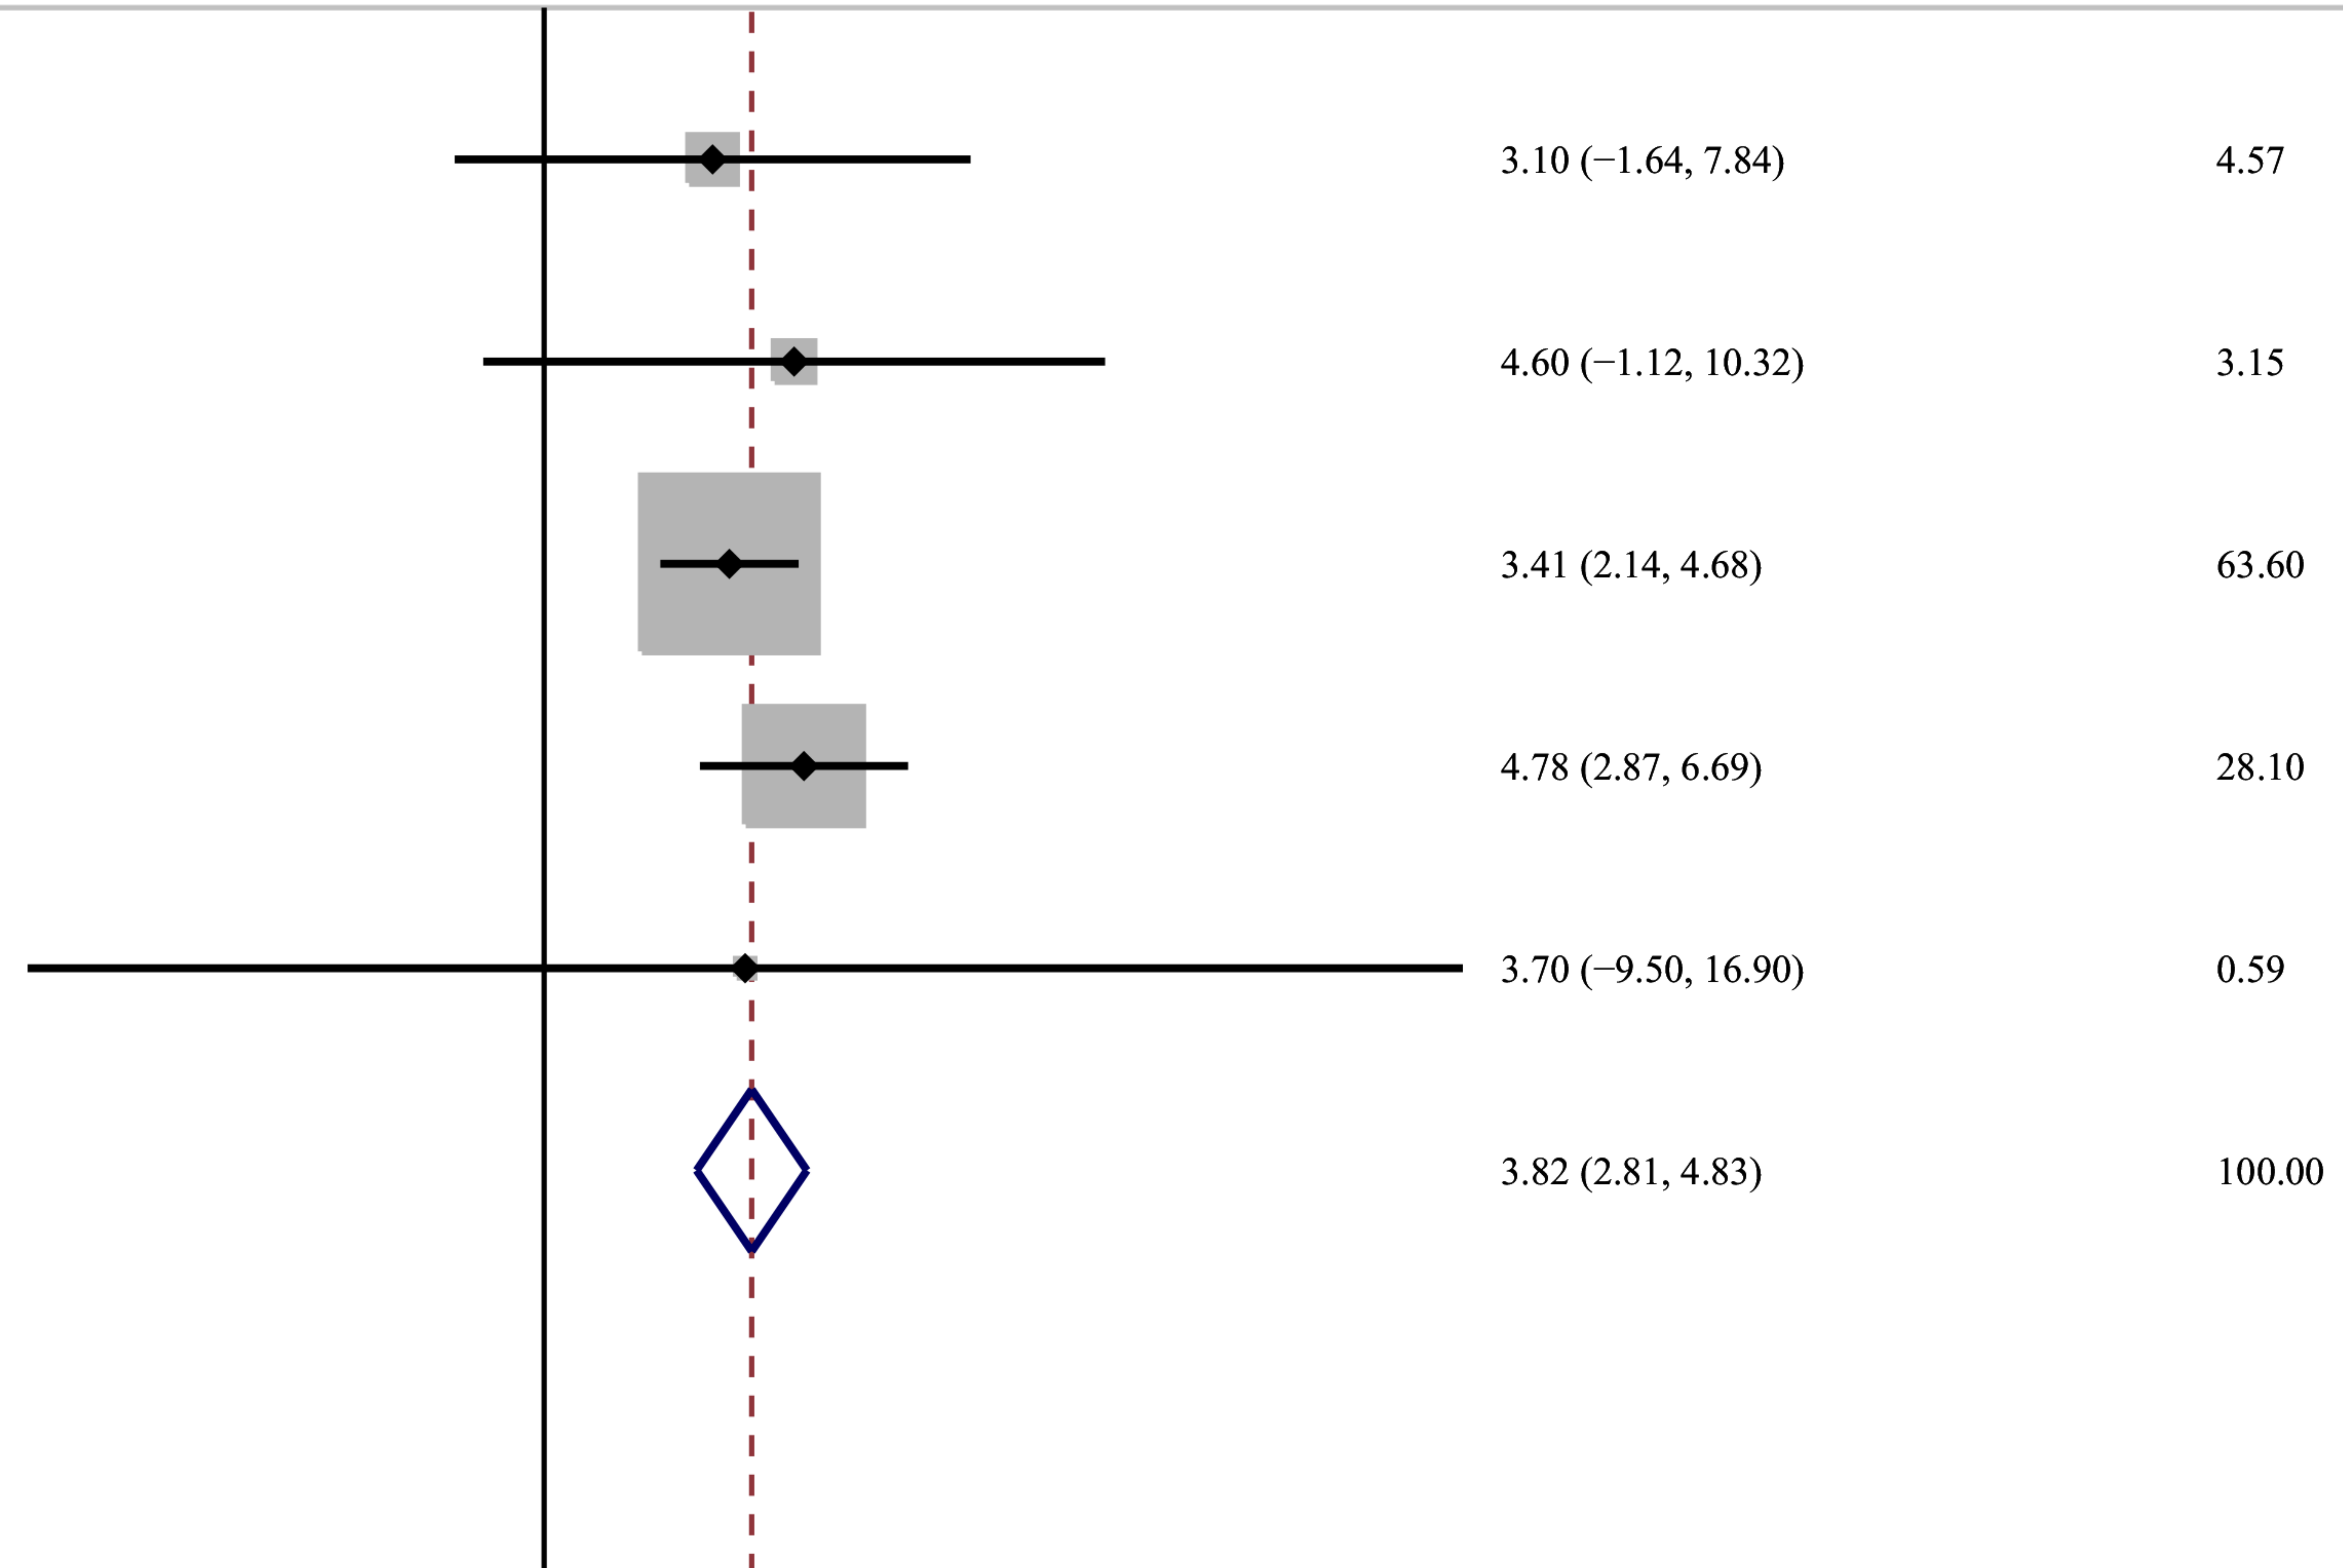

**Supplementary Figure 1.** WMD forest plot and its 95%CI for ages in LPR+ OSAHS group and LPR- OSAHS group.

**Supplementary Figure 2.** WMD forest plot and its 95%CI for BMI in LPR- OSAHS group and LPR+ OSAHS group.

**Supplementary Figure 3.** WMD forest plot and its 95%CI for AHI in LPR- OSAHS group and LPR+ OSAHS group.

**Supplementary Figure 4.** WMD forest plot and its 95%CI for minimum oxygen saturation in LPR- OSAHS group and LPR+ OSAHS group.
